# Supplementary material for: Insight into the microscopic morphology and electrochemical performance correlation mechanism upon calcination at different temperatures of a novel spherical cobalt-free 0.6Li2MnO3·0.4Li[Fe1/3Ni1/3Mn1/3]O2 cathode
Source: Royal Society of Chemistry journal article supplement (doi:10.1039/d1se00312g), 2021-01-01
Supplement: d1se00312g1.pdf [file d1se00312g1.pdf]

**Supplementary information**

**Insight into microscopic morphology and electrochemical performance  
correlation mechanism upon calcination temperature of novel spherical cobalt-  
free  $0.6\text{Li}_2\text{MnO}_3 \cdot 0.4\text{Li}[\text{Fe}_{1/3}\text{Ni}_{1/3}\text{Mn}_{1/3}]\text{O}_2$  cathode**

Zhuangzhi Li<sup>1</sup>, Bingshu Guo<sup>1</sup>, Ke Qu<sup>2\*</sup>, Pei Li<sup>1</sup>, Xinhui Liu<sup>1</sup>, Yifu Jin<sup>1</sup>, Junchen  
Chen<sup>1</sup>, Zhiyuan Ma<sup>1</sup>, Yun Huang<sup>1</sup>, Mingshan Wang<sup>1</sup>, Rong Huang<sup>2</sup>, Zhenzhong  
Yang<sup>2\*</sup>, Xing Li<sup>1\*</sup>

<sup>1</sup> School of New Energy and Materials, Southwest Petroleum University, Chengdu,  
Sichuan 610500, P.R. China

Corresponding Authors:\*(X.L) Tel: +86 28 83037409. Fax: +86 28 83037409.

\* E-mails: ke.qu@siat.ac.cn (K. Q.), zzyang@phy.ecnu.edu.cn (Z. Yang),

lixing198141@yahoo.com (X. Li)

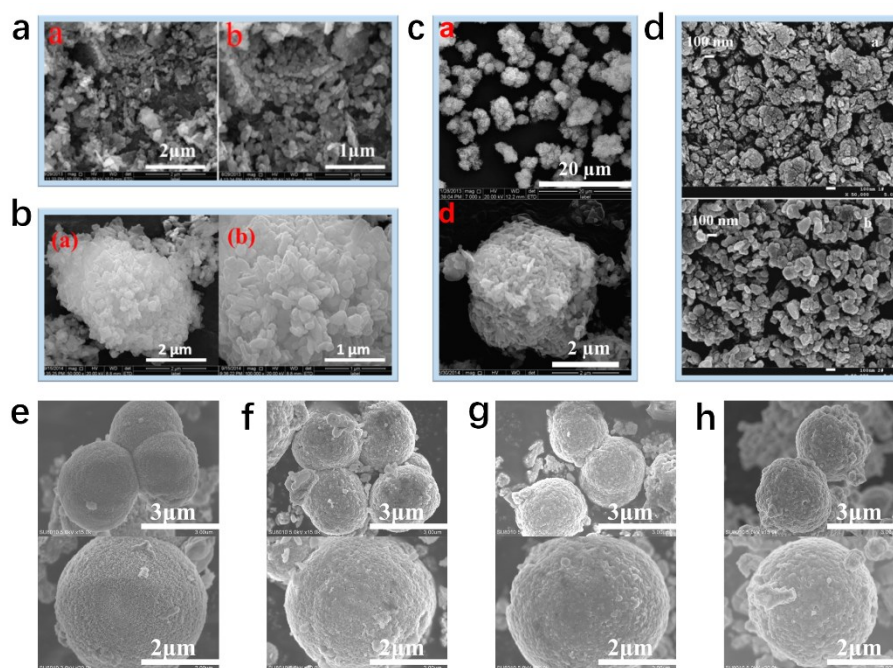

**Fig. S1** SEM images of (a)  $0.4\text{Li}_2\text{MnO}_3 \cdot 0.6\text{Li}[\text{Fe}_{1/3}\text{Ni}_{1/3}\text{Mn}_{1/3}]\text{O}_2$  <sup>[1]</sup>, Reprinted (adapted) with permission from (ACS Applied Materials & Interfaces, 2014, 6, 22305-22315.). Copyright (2014) American Chemical Society; (b)  $0.5\text{Li}_2\text{MnO}_3 \cdot 0.5\text{Li}[\text{Fe}_{0.25}\text{Ni}_{0.375}\text{Mn}_{0.375}]\text{O}_2$  <sup>[2]</sup>, Reprinted (adapted) with permission from (ACS Applied Materials & Interfaces, 2015, 25, 51-53.). Copyright (2015) American Chemical Society; (c)  $0.5\text{Li}_2\text{MnO}_3 \cdot 0.5\text{Li}[\text{Fe}_{0.25}\text{Ni}_{0.375}\text{Mn}_{0.375}]\text{O}_2$  <sup>[3]</sup>, Reprinted (adapted) with permission from (ACS Applied Materials & Interfaces, 2014, 6, 21711-21720.). Copyright (2014) American Chemical Society; (d)  $0.6\text{Li}_2\text{MnO}_3 \cdot 0.4\text{Mn}_{1/3}\text{Ni}_{1/3}\text{Fe}_{1/3}\text{O}_2$  <sup>[4]</sup>, Reproduced with permission-Copyright 2013, Elsevier (Electrochimica Acta, 2013, 88, 112-116.). SEM images of the  $[\text{Fe}_{2/15}\text{Ni}_{2/15}\text{Mn}_{11/15}]\text{CO}_3$  precursor (e), LFNMO cathodes prepared at different calcination temperatures: (f)800 °C, (g) 850 °C, (h) 900 °C in this work.

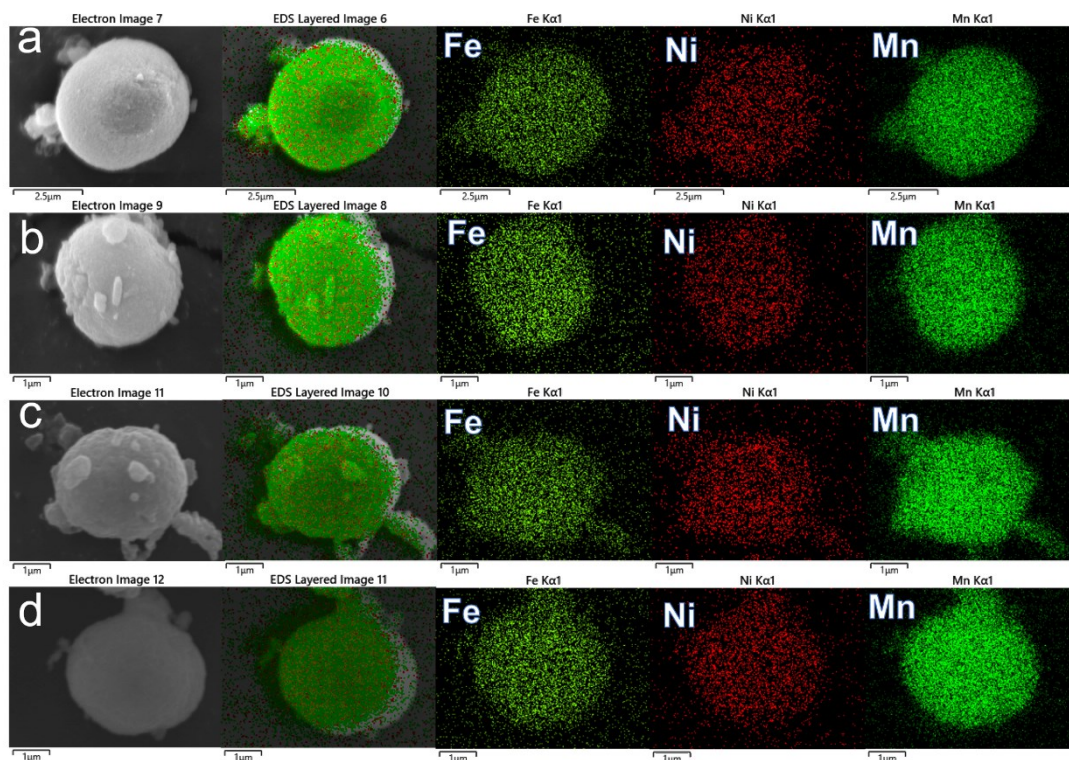

**Fig. S2** EDX mapping of the (a)  $[\text{Fe}_{2/15}\text{Ni}_{2/15}\text{Mn}_{11/15}]\text{CO}_3$  precursor, LFNMO cathodes prepared at different calcination temperatures: (b) 800 °C, (c) 850 °C, (d) 900 °C.

**Table S1** Transition metal element ratios in the precursor and LFNMO cathodes prepared at different calcination temperatures via ICP-OES analysis.

| Sample    | Element | wt.%  | Theoretical value (wt.%) |
|-----------|---------|-------|--------------------------|
| precursor | Mn      | 72.51 | 72.51                    |
|           | Fe      | 13.58 | 13.40                    |
|           | Ni      | 13.91 | 14.09                    |
|           | total   | 100   | 100                      |
| 800 °C    | Mn      | 72.60 | 72.51                    |
|           | Fe      | 13.24 | 13.40                    |

---

|        |       |       |       |
|--------|-------|-------|-------|
|        | Ni    | 14.16 | 14.09 |
|        | total | 100   | 100   |
| 850 °C | Mn    | 72.49 | 72.51 |
|        | Fe    | 13.40 | 13.40 |
|        | Ni    | 14.11 | 14.09 |
|        | total | 100   | 100   |
| 900 °C | Mn    | 72.60 | 72.51 |
|        | Fe    | 13.01 | 13.40 |
|        | Ni    | 14.39 | 14.09 |
|        | total | 100   | 100   |

---

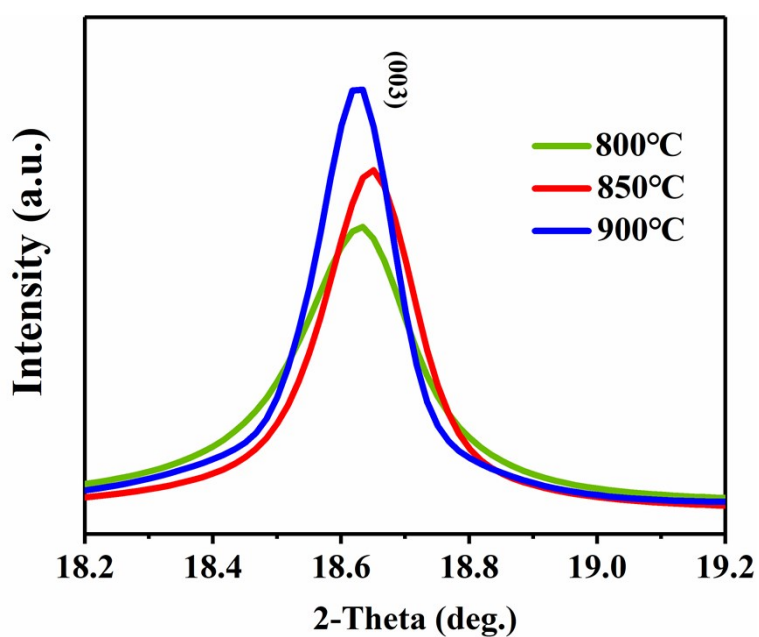

**Fig. S3** (003) diffraction peaks of the LFNMO cathodes prepared at different calcination temperatures.

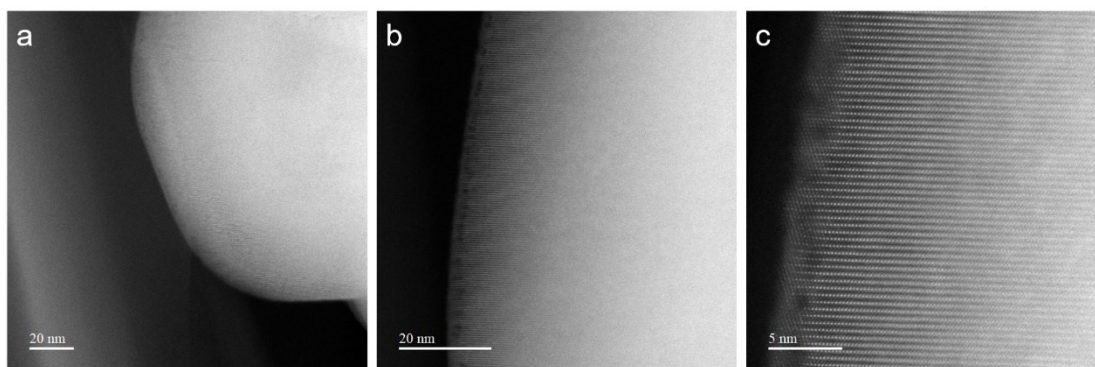

**Fig. S4** HAADF-STEM images of the LFNMO sample calcinated at 900 °C.

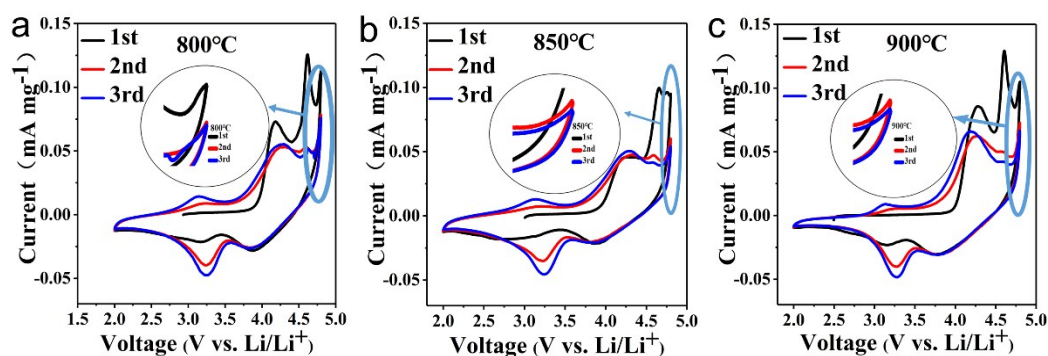

**Fig. S5** The first three cyclic voltammetry curves of LFNMO cathodes calcinated at (a) 800 °C, (b) 850 °C and (c) 900 °C.

**Table S2** Comparison of the electrochemical performance and tap density of the as-prepared material with the other reported cobalt-free cathodes.

| Cathodes                                                                    | Cycle number      | Discharge capacity in voltage range of 2-4.8 V (mAh g <sup>-1</sup> ) | Current Densities (mA g <sup>-1</sup> ) | Tap Density (g cm <sup>-3</sup> ) |
|-----------------------------------------------------------------------------|-------------------|-----------------------------------------------------------------------|-----------------------------------------|-----------------------------------|
| In this work. 0.4Li <sub>2</sub> MnO <sub>3</sub> ·                         | 100 <sup>th</sup> | 800 °C                                                                | 163.8                                   | 1.91                              |
| 0.6Li[Fe <sub>1/3</sub> Ni <sub>1/3</sub> Mn <sub>1/3</sub> ]O <sub>2</sub> |                   | 850 °C                                                                | 208.1                                   | 25                                |
|                                                                             |                   | 900 °C                                                                | 201.9                                   |                                   |
|                                                                             | 200 <sup>th</sup> | 800 °C                                                                | 136.7                                   |                                   |

|                                                                                      |                  |        |       |    |     |
|--------------------------------------------------------------------------------------|------------------|--------|-------|----|-----|
|                                                                                      |                  | 850 °C | 189.7 |    |     |
|                                                                                      |                  | 900 °C | 183.6 |    |     |
| 0.4Li <sub>2</sub> MnO <sub>3</sub> ·                                                | 50 <sup>th</sup> |        | 151.2 | 20 | n/a |
| 0.6Li[Fe <sub>1/3</sub> Ni <sub>1/3</sub> Mn <sub>1/3</sub> ]O <sub>2</sub> [1]      |                  |        |       |    |     |
| 0.5Li <sub>2</sub> MnO <sub>3</sub> ·                                                | 50 <sup>th</sup> |        | 165.8 | 20 | n/a |
| 0.5Li[Fe <sub>0.25</sub> Ni <sub>0.375</sub> Mn <sub>0.375</sub> ]O <sub>2</sub> [2] |                  |        |       |    |     |
| 0.5Li <sub>2</sub> MnO <sub>3</sub> ·                                                | 50 <sup>th</sup> |        | 164.8 | 20 | n/a |
| 0.5Li[Fe <sub>0.25</sub> Ni <sub>0.375</sub> Mn <sub>0.375</sub> ]O <sub>2</sub> [3] |                  |        |       |    |     |
| 0.6Li <sub>2</sub> MnO <sub>3</sub> ·                                                | 20 <sup>th</sup> |        | 192.4 | 30 | n/a |
| 0.4Mn <sub>1/3</sub> Ni <sub>1/3</sub> Fe <sub>1/3</sub> O <sub>2</sub> [4]          |                  |        |       |    |     |

**Table S3** Specific discharge capacity at different rates.

| Sample                       |      | 800 °C                                   | 850 °C | 900 °C |
|------------------------------|------|------------------------------------------|--------|--------|
|                              |      | Specific capacity (mAh g <sup>-1</sup> ) |        |        |
|                              | C/10 | 165                                      | 213    | 200    |
|                              | C/5  | 139                                      | 168    | 166    |
| Rate                         | C/3  | 119                                      | 144    | 140    |
| (1C=250 mA g <sup>-1</sup> ) | C/2  | 106                                      | 130    | 122    |
|                              | 1C   | 96                                       | 106    | 97     |
|                              | 2C   | 60                                       | 82     | 72     |
|                              | 3C   | 46                                       | 67     | 54     |



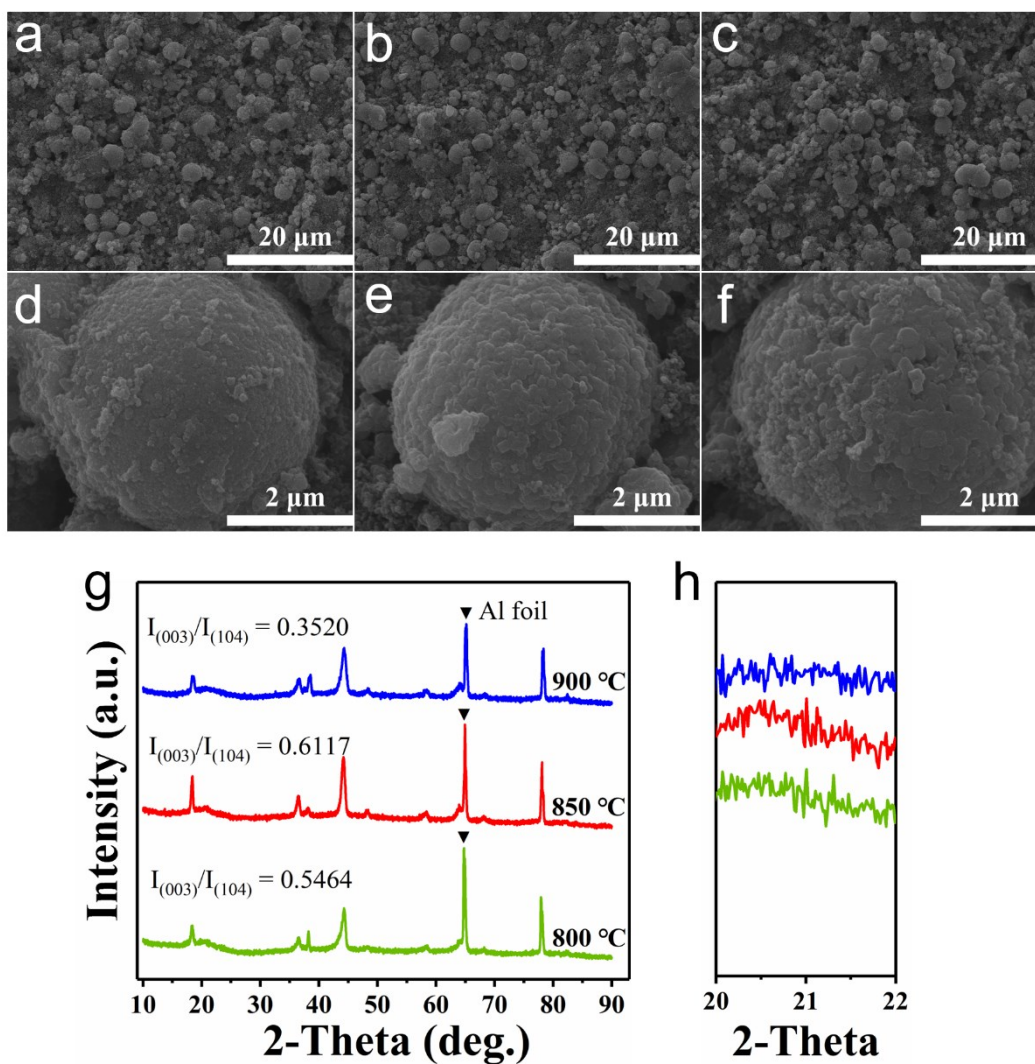

**Fig. S6** SEM images of cycled LFNMO cathodes prepared at (a, d) 800 °C, (b, e) 850 °C and (c, f) 900 °C. (g, h) XRD patterns of cycled LFNMO cathodes prepared at different calcination temperatures.

References:

- [1]. T. Zhao, S. Chen, L. Li, X. Zhang, H. Wu, T. Wu, C. Sun, R. Chen, F. Wu, J. Lu and K. Amine, *ACS Applied Materials & Interfaces*, 2014, **6**, 22305-22315.

---

[2]. F. Wu, X. Zhang, T. Zhao, L. Li, M. Xie and R. Chen, ACS Applied Materials & Interfaces, 2015, 25, 51-53.

[3]. T. Zhao, S. Chen, R. Chen, L. Li, X. Zhang, X. Man and W. Feng, ACS Applied Materials & Interfaces, 2014, 6, 21711-21720.

[4]. G. B. Liu, H. Liu and Y. F. Shi, Electrochimica Acta, 2013, **88**, 112-116.
